# Supplementary material
Source: publisher figshare collection journal article supplement (https://acs.figshare.com/ndownloader/files/4384246)

Supplementary Figure 1A

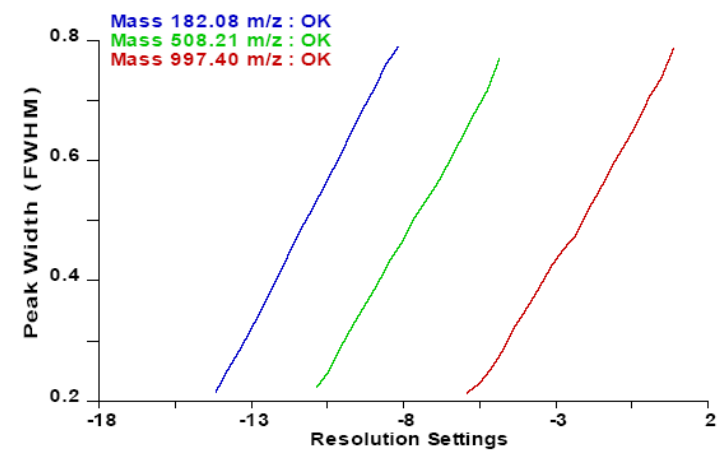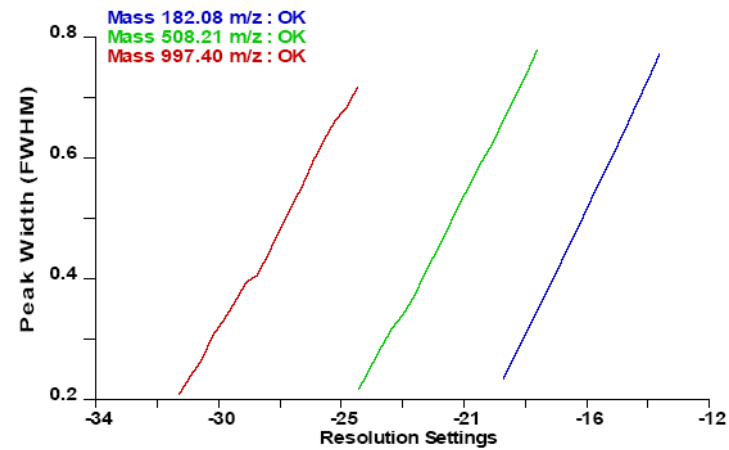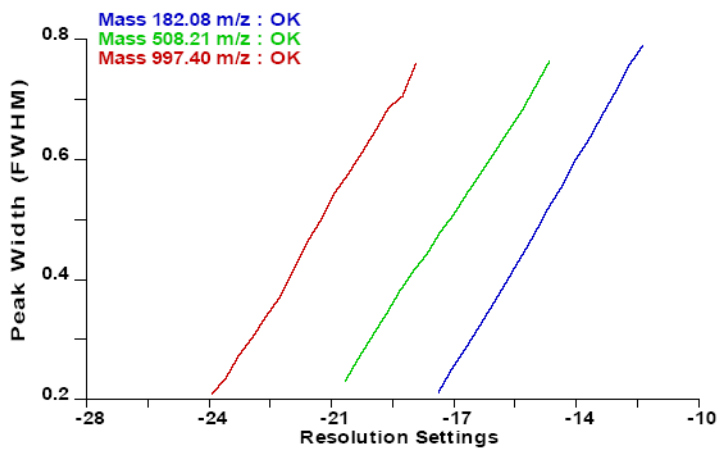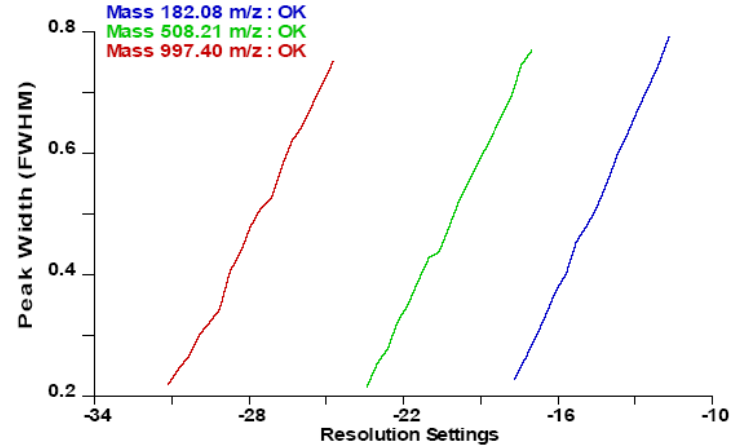

Supplementary Figure 1B

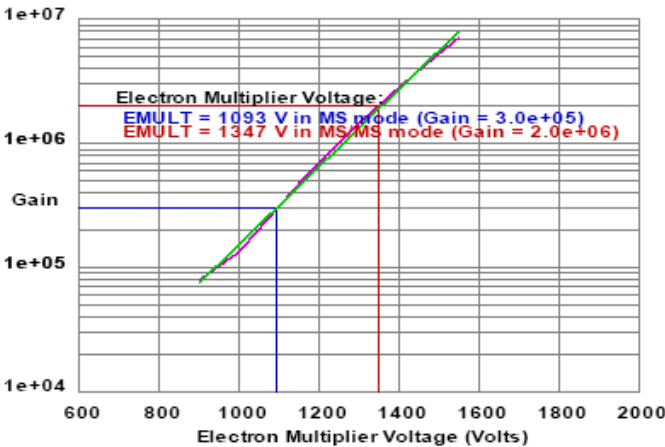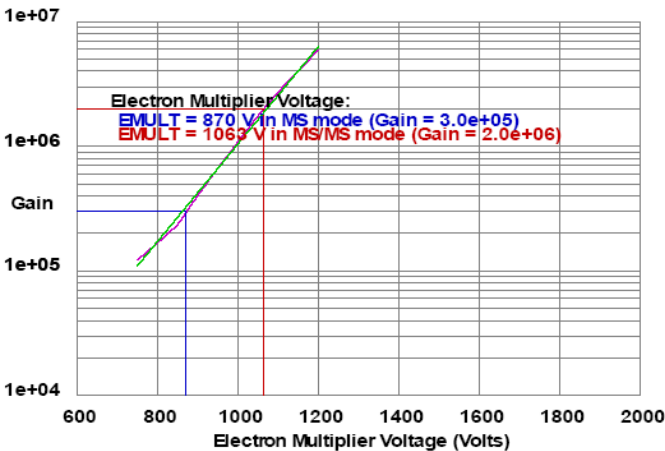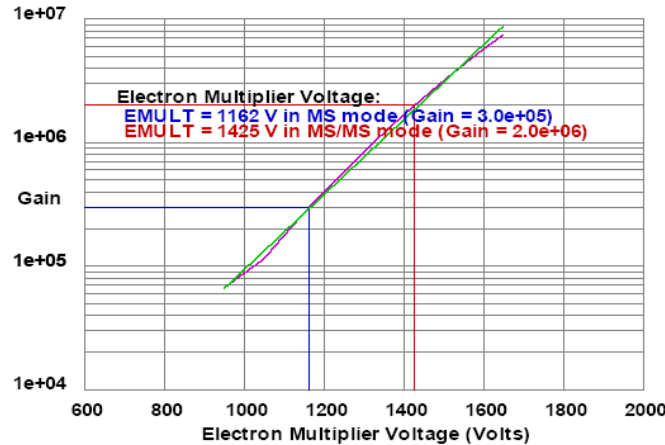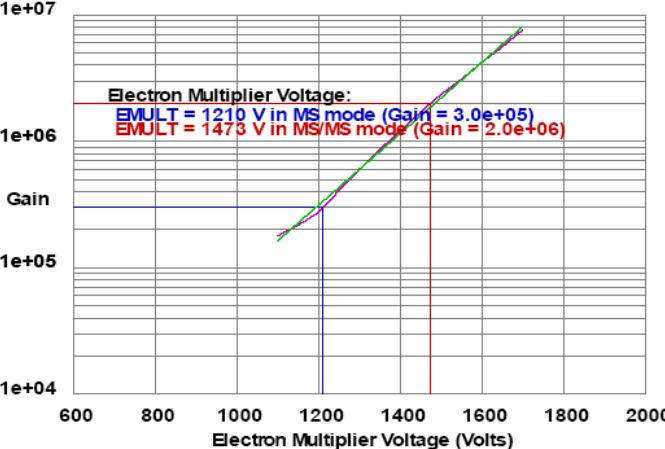

Supplement: Supplementary file 1 [file 4384246]
